# Supplementary material for: A claims data-based comparison of comorbidity in individuals with and without dementia
Source: PubMed Central journal article supplement (PMC3909381; doi:10.1186/1471-2318-14-10), 2014-01-28
Supplement: 1471-2318-14-10-S1.pdf [file 1471-2318-14-10-S1.pdf]

### Additional file 1: Source of origin got considered comorbidity complexes

The final 30 groups were chosen

- a) because of being among the 15 most prevalent groups in the case or control group (prevalence)
- b) because at least 5 out of 15 similar publications (references [ 5-10, 12, 16-23]of the paper) also mentioned the diagnosis group (literature) or
- c) after thoroughly appraisal of their clinical relevance (discussion)

The ICD codes for constructing the disease complexes refer to references Schäfer et al. (reference 16), Löppönen et al (reference 12), Ziegler (reference 22) and Borchelt (reference 23), which have been partially amended by acute forms of the conditions.

| Nr | Diagnosis Group                                                                                   | Source of origin       | ICD 10 codes           |
|----|---------------------------------------------------------------------------------------------------|------------------------|------------------------|
| 1  | Cancer (all) (C00-D48)                                                                            | prevalence, literature | 16                     |
| 2  | Anemias (D50-53, D55-D64)                                                                         | literature             | 16+ acute forms        |
| 3  | Thyroid Dysfunction (E01-07)                                                                      | prevalence, literature | 16+ acute forms        |
| 4  | Diabetes (E10-E11)                                                                                | prevalence, literature | 16                     |
| 5  | Disorders of lipoprotein metabolism and other lipidaemias (E78)                                   | prevalence             | 16                     |
| 6  | Fluids/electrolyte disorders (E86, E87, R60)                                                      | prevalence             | 23                     |
| 7  | Psychotic/neurotic disorders (F20-29, F40-48)                                                     | discussion             | ICD 10 GM Version 2006 |
| 8  | Depression (F32-33)                                                                               | prevalence             | 16                     |
| 9  | Insomnia (F51, G47)                                                                               | discussion             | 16                     |
| 10 | Severe vision reduction(H17-18, H25-28, H31, H33, H34.1-.2, H34.8-.9, H35-36, H40, H43, H47, H54) | prevalence             | 16+ acute forms        |
| 11 | Severe hearing loss (H90, H91)                                                                    | discussion             | 16+ acute forms        |
| 12 | Parkinson (G20-22)                                                                                | literature             | 16                     |
| 13 | Hypertension (I10-I15)                                                                            | prevalence, literature | 16                     |
| 14 | CAD (I20-25)                                                                                      | prevalence, literature | 12, 22                 |
| 15 | Cardiac arrhythmias (I44-49)                                                                      | prevalence, literature | 16+ acute forms        |
| 16 | Cardiac insufficiency (I50)                                                                       | prevalence, literature | 16                     |
| 17 | Atherosclerosis/Peripheral arterial occlusive disease (I65-66, I67.2, I70, I73.9)                 | prevalence, literature | 16                     |
| 18 | Cerebral ischemia/Chronic stroke (G45, I60-64, I69)                                               | prevalence, literature | 16                     |
| 19 | Lower limb varicosis (I83, I87.2)                                                                 | prevalence             | 16                     |
| 20 | Pneumonia (J12-18)                                                                                | discussion             | 22                     |

|    |                                                        |             |                        |
|----|--------------------------------------------------------|-------------|------------------------|
| 21 | Asthma/COPD (J40-47)                                   | literature  | 16+ acute forms        |
| 22 | Arthritis (M02, M05-M06, M08, M10, M11-M13)            | discussion  | 12                     |
| 23 | Joint Arthrosis (M15-19)                               | prevalence  | 16                     |
| 24 | Purine/pyrimidine metabolism disorders/Gout (E79, M10) | Top 15 both | 16                     |
| 25 | Low back pain (M40-48, M50-54)                         | Top 15 both | 16+ acute forms        |
| 26 | Osteoporosis (M80-82)                                  | Discussion  | 16                     |
| 27 | Renal insufficiency/failure (N17-19)                   | Literature  | 16+ acute forms        |
| 28 | Incontinence (N39.3, R32, R15)                         | Top 15 case | 16+ fecal incontinence |
| 29 | Fractures and Injuries (S00-T14)                       | Top 15 both | ICD 10 GM Version 2006 |
| 30 | Fall risk and dizziness (R26, R29.6, R42, H81, H82)    | Discussion  | 23                     |
