# Supplementary material for: A claims data-based comparison of comorbidity in individuals with and without dementia
Source: PubMed Central journal article supplement (PMC3909381; doi:10.1186/1471-2318-14-10), 2014-01-28
Supplement: 1471-2318-14-10-S2.pdf [file 1471-2318-14-10-S2.pdf]

**Additional file 2: Diagnosed comorbidity complexes of community-living dementia patients and control subjects stratified by gender**

| Diagnosis group                                           | Men (N=9,973;<br>1,684 cases; 8,289 control subjects) |             |                  | Women (N=23,146; 3,840 cases;<br>19,306 control subjects) |             |                  |
|-----------------------------------------------------------|-------------------------------------------------------|-------------|------------------|-----------------------------------------------------------|-------------|------------------|
|                                                           | Case (%)                                              | Control (%) | OR*              | Case (%)                                                  | Control (%) | OR*              |
| <b>Neoplasms</b>                                          |                                                       |             |                  |                                                           |             |                  |
| Cancer (all)                                              | 37.4                                                  | 35.9        | 1.03 (0.92-1.15) | 23.4                                                      | 24.1        | 0.97 (0.89-1.05) |
| <b>Diseases of the blood and blood-forming organs</b>     |                                                       |             |                  |                                                           |             |                  |
| Anaemia                                                   | 26.5                                                  | 19.8        | 1.41 (1.25-1.60) | 24.7                                                      | 18.8        | 1.40 (1.29-1.52) |
| <b>Endocrine, nutritional and metabolic diseases</b>      |                                                       |             |                  |                                                           |             |                  |
| Thyroid dysfunction                                       | 19.7                                                  | 17.7        | 1.10 (0.97-1.26) | 30.4                                                      | 32.6        | 0.93 (0.86-1.00) |
| Diabetes                                                  | 49.6                                                  | 40.0        | 1.41 (1.27-1.57) | 44.7                                                      | 38.6        | 1.29 (1.20-1.38) |
| Disorders of lipoprotein metabolism and other lipidaemias | 51.3                                                  | 51.3        | 0.95 (0.86-1.06) | 47.4                                                      | 52.2        | 0.86 (0.80-0.92) |
| Fluids/electrolyte disorders                              | 29.1                                                  | 16.9        | 1.96 (1.74-2.21) | 29.6                                                      | 20.3        | 1.61 (1.49-1.74) |
| <b>Mental and behavioural disorders</b>                   |                                                       |             |                  |                                                           |             |                  |
| Psychotic/neurotic disorders                              | 20.8                                                  | 13.4        | 1.66 (1.45-1.89) | 27.6                                                      | 19.8        | 1.62 (1.49-1.75) |
| Depression                                                | 25.4                                                  | 10.1        | 2.94 (2.58-3.35) | 34.3                                                      | 20.0        | 2.11 (1.96-2.28) |
| Insomnia                                                  | 16.3                                                  | 9.5         | 1.81 (1.56-2.10) | 17.2                                                      | 13.0        | 1.36 (1.23-1.49) |
| <b>Diseases of the nervous system</b>                     |                                                       |             |                  |                                                           |             |                  |
| Parkinson's disease                                       | 14.8                                                  | 2.9         | 5.73 (4.75-6.92) | 8.2                                                       | 2.4         | 3.57 (3.08-4.14) |
| <b>Diseases of the eye and ear</b>                        |                                                       |             |                  |                                                           |             |                  |
| Severe vision reduction                                   | 43.1                                                  | 47.3        | 0.81 (0.73-0.90) | 41.9                                                      | 51.3        | 0.68 (0.64-0.73) |
| Severe hearing loss                                       | 22.7                                                  | 20.7        | 1.09 (0.96-1.24) | 18.8                                                      | 17.3        | 1.06 (0.97-1.16) |
| <b>Diseases of the circulatory system</b>                 |                                                       |             |                  |                                                           |             |                  |
| Hypertension                                              | 75.4                                                  | 73.1        | 1.03 (0.92-1.16) | 77.0                                                      | 79.7        | 0.83 (0.76-0.90) |
| Coronary artery disease (CAD)                             | 48.8                                                  | 42.9        | 1.22 (1.10-1.35) | 38.6                                                      | 36.4        | 1.06 (0.98-1.13) |
| Cardiac arrhythmias                                       | 35.1                                                  | 31.6        | 1.14 (1.02-1.27) | 28.8                                                      | 27.4        | 1.03 (0.96-1.12) |
| Cardiac insufficiency                                     | 39.2                                                  | 25.8        | 1.84 (1.64-2.05) | 44.4                                                      | 33.9        | 1.45 (1.35-1.56) |
| Atherosclerosis/peripheral arterial occlusive disease     | 50.9                                                  | 32.3        | 2.09 (1.88-2.33) | 43.1                                                      | 29.8        | 1.75 (1.63-1.87) |
| Cerebral ischaemia/chronic stroke                         | 38.0                                                  | 15.6        | 3.23 (2.88-3.62) | 26.7                                                      | 13.8        | 2.20 (2.03-2.39) |
| Lower limb varicosis                                      | 19.2                                                  | 16.5        | 1.17(1.02-1.34)  | 29.8                                                      | 29.5        | 1.02 (0.95-1.10) |

**Diseases of the respiratory system**

|                                                     |      |      |                  |      |      |                  |
|-----------------------------------------------------|------|------|------------------|------|------|------------------|
| Pneumonia                                           | 11.9 | 6.2  | 1.98 (1.66-2.35) | 7.4  | 4.4  | 1.69 (1.47-1.95) |
| Asthma/chronic obstructive pulmonary disease (COPD) | 35.0 | 31.0 | 1.16 (1.04-1.30) | 23.3 | 22.9 | 1.02 (0.9-1.11)  |

**Diseases of the musculoskeletal system and connective tissue**

|                                             |      |      |                  |      |      |                  |
|---------------------------------------------|------|------|------------------|------|------|------------------|
| Arthritis                                   | 14.9 | 15.3 | 0.95 (0.82-1.10) | 12.1 | 13.1 | 0.92 (0.83-1.02) |
| Joint arthrosis                             | 38.3 | 39.6 | 0.91 (0.82-1.02) | 47.3 | 50.6 | 0.87 (0.81-0.93) |
| Purine/pyrimidine metabolism disorders/gout | 35.3 | 36.9 | 0.90 (0.81-1.01) | 25.0 | 24.9 | 1.00 (0.92-1.08) |
| Low back pain                               | 54.5 | 55.9 | 0.90 (0.81-1.00) | 58.0 | 60.8 | 0.91 (0.85-0.97) |
| Osteoporosis                                | 9.1  | 6.5  | 1.40 (1.16-1.69) | 31.6 | 29.3 | 1.11 (1.03-1.19) |

**Diseases of the genitourinary system**

|                             |      |      |                  |      |      |                  |
|-----------------------------|------|------|------------------|------|------|------------------|
| Renal insufficiency/failure | 29.2 | 20.2 | 1.59 (1.41-1.79) | 17.8 | 14.2 | 1.26 (1.15-1.38) |
| Incontinence                | 43.0 | 17.5 | 3.46 (3.09-3.88) | 45.5 | 25.6 | 2.38 (2.22-2.56) |

**Injuries, fractures and fall risks**

|                         |      |      |                  |      |      |                  |
|-------------------------|------|------|------------------|------|------|------------------|
| Fractures and injuries  | 35.1 | 27.6 | 1.38 (1.23-1.54) | 40.2 | 32.2 | 1.39 (1.29-1.49) |
| Fall risk and dizziness | 24.9 | 15.2 | 1.80 (1.59-2.05) | 29.0 | 22.0 | 1.41 (1.30-1.52) |

---

\*ORs are adjusted for age.
